# Supplementary material
Source: MDPI journal article supplement (https://www.mdpi.com/2311-7524/8/6/539)
Supplement: s1 [file s1]

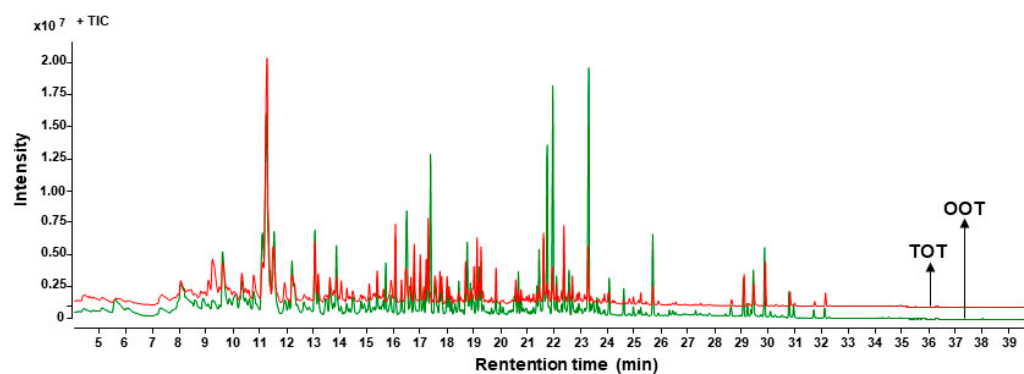

**Supplemental Figure S1.** Total ion chromatograms of volatile components of TOT and OOT.

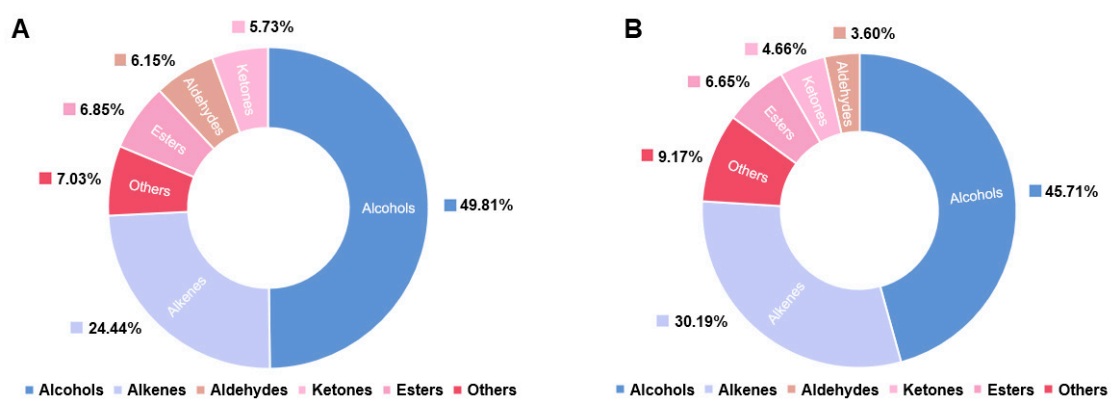

**Supplemental Figure S2.** The six volatile categories of TOT (A) and OOT (B).

**Supplemental Table S1.** The substance groupings for calculating the Wickremasinghe-Yamanishi ratio.

| Retention<br>time (min)                           | Compounds                                        | Relative Content <sup>a</sup> |              |
|---------------------------------------------------|--------------------------------------------------|-------------------------------|--------------|
|                                                   |                                                  | TOT                           | OOT          |
| 4.425                                             | Furfural                                         | 0.43±0.00                     | 0.27±0.06    |
| 4.464                                             | 3-Furaldehyde                                    | 0.29±0.02                     | 0.10±0.01    |
| 5.123                                             | <i>p</i> -Xylene                                 | 0.36±0.02                     | 0.52±0.03    |
| 5.652                                             | 1,3,5,7-Cyclooctatetraene                        | 0.28±0.08                     | 1.48±0.17    |
| 6.047                                             | Styrene                                          | 0.31±0.06                     | 0.65±0.11    |
| 7.326                                             | Benzaldehyde                                     | 1.00±0.06                     | 0.77±0.13    |
| 8.054                                             | β-Myrcene                                        | 1.24±0.25                     | 2.28±0.34    |
| 8.969                                             | <i>o</i> -Cymene                                 | 0.36±0.06                     | 0.00         |
| 9.073                                             | D-Limonene                                       | 0.78±0.16                     | 0.45±0.03    |
| 9.255                                             | Benzyl alcohol                                   | 2.6±0.1                       | 1.04±0.13    |
| 9.506                                             | Benzeneacetaldehyde                              | 0.52±0.02                     | 0.3±0.05     |
| 9.628                                             | β-Ocimene                                        | 1.74±0.18                     | 2.64±0.39    |
| 10.057                                            | Ethanone, 1-(1H-pyrrol-2-yl)-                    | 0.74±0.02                     | 1.17±0.20    |
| 10.343                                            | Linalool oxide I                                 | 1.19±0.12                     | 1.52±0.23    |
| 10.785                                            | Linalool oxide II                                | 1.38±0.15                     | 1.46±0.30    |
| <b>Total content of substance before linalool</b> |                                                  | <b>13.22</b>                  | <b>14.65</b> |
| 11.115                                            | Linalool                                         | 1.27±0.12                     | 2.51±0.36    |
| 11.266                                            | Hotrienol                                        | 9.22±0.79                     | 7.26±1.07    |
| 11.96                                             | 1,3,8- <i>p</i> -Menthatriene                    | 0.77±0.03                     | 0.66±0.09    |
| 12.099                                            | 2,5-Pyrrolidinedione, 1-ethyl-                   | 0.12±0.06                     | 0.38±0.04    |
| 12.225                                            | Benzyl nitrile                                   | 1.42±0.02                     | 1.31±0.25    |
| 13.087                                            | Linalool Oxide III                               | 1.26±0.14                     | 1.82±0.24    |
| 13.794                                            | Methyl salicylate                                | 0.34±0.04                     | 0.27±0.03    |
| 13.885                                            | Dodecane                                         | 0.68±0.03                     | 1.41±0.19    |
| 14.058                                            | Decanal                                          | 0.43±0.11                     | 0.29±0.02    |
| 14.271                                            | Undecane, 2,6-dimethyl-                          | 0.41±0.05                     | 0.4±0.04     |
| 14.371                                            | Benzaldehyde, 3,5-dimethyl-                      | 0.17±0.03                     | 0.16±0.01    |
| 15.311                                            | Dodecane, 4,6-dimethyl-                          | 0.23±0.02                     | 0.16±0.01    |
| 15.411                                            | Geraniol                                         | 0.75±0.05                     | 0.69±0.09    |
| 15.732                                            | 1-Butanamine, N-butyl-N-nitroso-                 | 0.09±0.00                     | 0.82±0.11    |
| 16.092                                            | Heptadecane, 8-methyl-                           | 1.37±0.04                     | 1.2±0.15     |
| 16.517                                            | Indole                                           | 1.26±0.17                     | 2.18±0.41    |
| 16.62                                             | Tridecane                                        | 0.29±0.05                     | 0.00         |
| 17.566                                            | Dodecane                                         | 0.70±0.00                     | 1.23±0.42    |
| 18.19                                             | Naphthalene, 1,2,3,4-tetrahydro-1,1,6-trimethyl- | 0.18±0.02                     | 0.22±0.02    |
| 18.463                                            | Tridecane, 3-methyl-                             | 0.32±0.03                     | 0.51±0.11    |
| 18.71                                             | α-Copaene                                        | 0.68±0.05                     | 0.33±0.03    |
| 18.78                                             | Hexanoic acid, 3-hexenyl ester, ( <i>Z</i> )-    | 0.29±0.07                     | 1.01±0.15    |
| 18.897                                            | Hexanoic acid, hexyl ester                       | 0.33±0.05                     | 0.62±0.08    |

|        |                                                                                                                                     |           |           |
|--------|-------------------------------------------------------------------------------------------------------------------------------------|-----------|-----------|
| 18.983 | Hexanoic acid, 2-hexenyl ester, ( <i>E</i> )-                                                                                       | 0.23±0.11 | 0.37±0.12 |
| 19.022 | 1-Tetradecene                                                                                                                       | 0.59±0.28 | 0.08±0.11 |
| 19.23  | Tetradecane                                                                                                                         | 0.34±0.10 | 0.60±0.08 |
| 19.287 | 2-Cyclopenten-1-one, 3-methyl-2-(2-pentenyl)                                                                                        | 1.00±0.18 | 0.48±0.06 |
| 19.603 | ( <i>E</i> )-2-Tetradecene,                                                                                                         | 0.13±0.03 | 0.08±0.01 |
| 19.686 | 1H-3a,7-Methanoazulene, 2,3,4,7,8,8a-hexahydro-3,6,8,8-tetramethyl-, [3R-(3 $\alpha$ ,3 $\alpha$ $\beta$ ,7 $\beta$ ,8 $\alpha$ )]- | 0.19±0.02 | 0.00      |
| 19.69  | Cyclohexene, 3-(1,5-dimethyl-4-hexenyl)-6-methylene-, [S-(R*,S*)]-                                                                  | 0.00      | 0.14±0.01 |
| 19.85  | Caryophyllene                                                                                                                       | 0.79±0.09 | 0.44±0.03 |
| 20.006 | $\alpha$ -Ionone                                                                                                                    | 0.08±0.02 | 0.20±0.01 |
| 20.535 | trans-Isoeugenol                                                                                                                    | 0.00      | 0.28±0.05 |
| 20.592 | 5,9-Undecadien-2-one, 6,10-dimethyl-, ( <i>E</i> )-                                                                                 | 0.59±0.14 | 0.41±0.04 |
| 20.687 | ( <i>E</i> )- $\beta$ -Farnesene                                                                                                    | 0.28±0.08 | 0.56±0.07 |
| 20.782 | 2,6,10-Trimethyltridecane                                                                                                           | 0.34±0.08 | 0.37±0.03 |
| 20.882 | Alloaromadendrene                                                                                                                   | 0.15±0.06 | 0.16±0.01 |
| 21.082 | Acetic acid, trifluoro-, dodecyl ester                                                                                              | 0.23±0.06 | 0.11±0.01 |
| 21.173 | 1-Isopropyl-4,7-dimethyl-1,2,3,4,5,6-hexahydronaphthalene                                                                           | 0.15±0.03 | 0.10±0.01 |
| 21.246 | $\gamma$ -Muurolene                                                                                                                 | 0.27±0.06 | 0.19±0.01 |
| 21.376 | Jasmine Lactone                                                                                                                     | 0.3±0.06  | 0.00      |
| 21.463 | ( <i>E</i> )- $\beta$ -Ionone                                                                                                       | 0.55±0.14 | 1.02±0.13 |
| 21.632 | 2H-Pyran-2-one, tetrahydro-6-(2-pentenyl)-, ( <i>Z</i> )-                                                                           | 1.41±0.28 | 1.24±0.16 |
| 21.706 | Pentadecane                                                                                                                         | 0.19±0.06 | 0.00      |
| 21.832 | $\alpha$ -Muurolene                                                                                                                 | 0.37±0.09 | 0.20±0.01 |
| 21.975 | $\alpha$ -Farnesene                                                                                                                 | 0.86±0.25 | 3.36±0.49 |
| 22.113 | Butylated Hydroxytoluene                                                                                                            | 0.38±0.09 | 0.56±0.06 |
| 22.17  | Naphthalene, 1,2,3,4,4a,5,6,8a-octahydro-7-methyl-4-methylene-1-(1-methylethyl)                                                     | 0.2±0.05  | 0.12±0.00 |
| 22.387 | Naphthalene, 1,2,3,5,6,8a-hexahydro-4,7-dimethyl-1-(1-methylethyl)-, (1 <i>S</i> )- <i>Z</i> -                                      | 1.12±0.74 | 1.08±0.12 |
| 22.443 | Epizonarene                                                                                                                         | 0.12±0.00 | 0.00      |
| 22.577 | 2(4H)-Benzofuranone, 5,6,7,7a-tetrahydro-4,4,7a-trimethyl-, (R)-                                                                    | 0.57±0.15 | 0.88±0.07 |
| 22.798 | Cyclohexene, 4-[(1 <i>E</i> )-1,5-dimethyl-1,4-hexadien-1-yl]-1-methyl-                                                             | 0.00      | 0.09±0.00 |
| 22.863 | $\alpha$ -Calacorene                                                                                                                | 0.25±0.06 | 0.14±0.00 |
| 23.15  | Heneicosane                                                                                                                         | 0.25±0.19 | 0.20±0.01 |
| 23.306 | Nerolidol                                                                                                                           | 1.09±0.33 | 3.92±0.47 |
| 23.379 | Hexadecane, 2-methyl-                                                                                                               | 0.00      | 0.19±0.01 |
| 23.882 | Cetene                                                                                                                              | 0.32±0.12 | 0.16±0.04 |
| 24.06  | Hexadecane                                                                                                                          | 0.30±0.09 | 0.59±0.05 |
| 24.272 | Cedrol                                                                                                                              | 0.15±0.08 | 0.09±0.02 |

|                                                         |                                                           |                 |                 |
|---------------------------------------------------------|-----------------------------------------------------------|-----------------|-----------------|
| 24.702                                                  | $\alpha$ -Corocalene                                      | 0.08 $\pm$ 0.02 | 0.03 $\pm$ 0.01 |
| 25.152                                                  | tau-Muurolol                                              | 0.23 $\pm$ 0.08 | 0.21 $\pm$ 0.00 |
| 25.23                                                   | Methyl jasmonate                                          | 0.25 $\pm$ 0.07 | 0.14 $\pm$ 0.03 |
| 25.43                                                   | $\alpha$ -Cadinol                                         | 0.14 $\pm$ 0.05 | 0.16 $\pm$ 0.01 |
| 25.881                                                  | Naphthalene, 1,6-dimethyl-4-(1-methylethyl)-              | 0.18 $\pm$ 0.07 | 0.12 $\pm$ 0.04 |
| 26.288                                                  | Heptadecane                                               | 0.48 $\pm$ 0.44 | 0.40 $\pm$ 0.27 |
| 26.414                                                  | Pentadecane, 2,6,10,14-tetramethyl-                       | 0.09 $\pm$ 0.01 | 0.13 $\pm$ 0.02 |
| 27.402                                                  | 6-Tetradecanesulfonic acid, butyl ester                   | 0.00            | 0.04 $\pm$ 0.02 |
| 27.459                                                  | Octacosane                                                | 0.04 $\pm$ 0.02 | 0.06 $\pm$ 0.02 |
| 28.152                                                  | 2-Dodecen-1-yl(-)succinic anhydride                       | 0.00            | 0.06 $\pm$ 0.00 |
| 28.278                                                  | 1-Octadecene                                              | 0.00            | 0.02 $\pm$ 0.00 |
| 28.413                                                  | Octadecane                                                | 0.02 $\pm$ 0.01 | 0.07 $\pm$ 0.02 |
| 28.612                                                  | Hexadecane, 2,6,10,14-tetramethyl-                        | 0.18 $\pm$ 0.05 | 0.28 $\pm$ 0.06 |
| 29.236                                                  | Neophytadiene                                             | 0.06 $\pm$ 0.03 | 0.19 $\pm$ 0.02 |
| 29.366                                                  | Fitone                                                    | 0.04 $\pm$ 0.01 | 0.18 $\pm$ 0.11 |
| 29.466                                                  | Caffeine                                                  | 0.34 $\pm$ 0.11 | 0.82 $\pm$ 0.07 |
| 29.887                                                  | Phthalic acid, isobutyl octyl ester                       | 0.78 $\pm$ 0.16 | 0.87 $\pm$ 0.16 |
| 30.446                                                  | Nonadecane                                                | 0.01 $\pm$ 0.00 | 0.02 $\pm$ 0.00 |
| 30.806                                                  | Di-sec-butyl phthalate                                    | 0.25 $\pm$ 0.05 | 0.31 $\pm$ 0.06 |
| 30.91                                                   | 7,9-Di-tert-butyl-1-oxaspiro(4,5)deca-6,9-diene-2,8-dione | 0.02 $\pm$ 0.01 | 0.03 $\pm$ 0.00 |
| 30.97                                                   | Hexadecanoic acid, methyl ester                           | 0.06 $\pm$ 0.02 | 0.17 $\pm$ 0.03 |
| 31.725                                                  | 1,2-Benzenedicarboxylic acid, butyl 2-methylpropyl ester  | 0.06 $\pm$ 0.01 | 0.11 $\pm$ 0.02 |
| 32.293                                                  | Hexadecanoic acid, ethyl ester                            | 0.01 $\pm$ 0.00 | 0.02 $\pm$ 0.01 |
| 34.166                                                  | 9,12-Octadecadienoic acid (Z,Z)-, methyl ester            | 0.00            | 0.02 $\pm$ 0.00 |
| 34.278                                                  | 9,12,15-Octadecatrienoic acid, methyl ester               | 0.00            | 0.02 $\pm$ 0.00 |
| <b>Total content of linalool and substance after it</b> |                                                           | <b>39.70</b>    | <b>48.33</b>    |

<sup>a</sup> **relative content:** use the material peak area / internal standard peak area as this substance's relative content

**Supplemental Table S2.** Aroma components of Groups I and Group II of Owuor's flavor index.

| Compounds         | Relative Content <sup>a</sup> |                 |
|-------------------|-------------------------------|-----------------|
|                   | TOT                           | OOT             |
| <b>Group II</b>   |                               |                 |
| Linalool oxide I  | 1.19 $\pm$ 0.12               | 1.52 $\pm$ 0.23 |
| Linalool          | 1.27 $\pm$ 0.12               | 2.51 $\pm$ 0.36 |
| Geraniol          | 0.75 $\pm$ 0.05               | 0.69 $\pm$ 0.09 |
| D-Limonene        | 0.78 $\pm$ 0.16               | 0.45 $\pm$ 0.03 |
| $\beta$ -Linalool | 1.74 $\pm$ 0.18               | 2.64 $\pm$ 0.39 |

|                         |              |              |
|-------------------------|--------------|--------------|
| Decanal                 | 0.43±0.11    | 0.29±0.02    |
| (Z)-Jasmone             | 1±0.18       | 0.48±0.06    |
| Methyl salicylate       | 0.34±0.04    | 0.27±0.03    |
| Jasmine Lactone         | 1.41±0.28    | 1.24±0.16    |
| <i>o</i> -Cymene        | 0.36±0.06    | 0            |
| Indole                  | 1.26±0.17    | 2.18±0.41    |
| Benzyl alcohol          | 2.6±0.10     | 1.04±0.13    |
| ( <i>E</i> )-Isoeugenol | 0            | 0.28±0.05    |
| $\alpha$ -Ionone        | 0.08±0.02    | 0.2±0.01     |
| Benzeneacetaldehyde     | 0.52±0.02    | 0.3±0.05     |
| trans- $\beta$ -Ionone  | 0.55±0.14    | 1.02±0.13    |
| <b>Total Group II</b>   | <b>14.28</b> | <b>15.11</b> |
| <b>Group I</b>          |              |              |
| <i>p</i> -Xylene        | 0.36±0.02    | 0.52±0.03    |
| <b>Total Group I</b>    | <b>0.36</b>  | <b>0.52</b>  |

<sup>a</sup> **relative content:** use the material peak area / internal standard peak area as this substance's relative content

**Supplemental Table S3.** The contents of taste components of TOT and OOT.

| Taste compounds                  | Tea samples |            |
|----------------------------------|-------------|------------|
|                                  | TOT         | OOT        |
| <b>Water extracts(%)</b>         | 55.10±1.06  | 50.80±0.27 |
| <b>Caffeine(mg/g)</b>            | 48.16±0.17  | 69.58±0.31 |
| <b>Total free amino acids(%)</b> | 4.20±0.10   | 3.30±0.03  |
| <b>Tea polyphenols(%)</b>        | 38.60±0.46  | 30.00±0.09 |
| <b>EC(mg/g)</b>                  | 4.93±0.09   | 5.34±0.93  |
| <b>ECG(mg/g)</b>                 | 30.92±0.93  | 17.27±0.15 |
| <b>EGC(mg/g)</b>                 | 19.38±0.26  | 13.09±0.21 |
| <b>EGCG(mg/g)</b>                | 101.81±0.17 | 79.21±1.15 |
| <b>C(mg/g)</b>                   | 4.72±0.36   | 1.80±0.37  |
